# Supplementary material
Source: Research Square preprint supplement (doi:10.21203/rs.3.rs-8988792/v1)
Supplement: Supplementary file 1 [file 821d7c782e93687827c415a1.docx]

**Supplementary material 3:** Ten keys recommended actions for each component

- Ten key political actions of each country

| **Indicators /Domains** | **Priority policy actions recommended to the government** |
| --- | --- |
| **Benin** | |
| PROMO3 | 1. Integrate the choice of healthy foods into the training program for children from preschool |
| PROV3 | 1. Strengthen staff by recruiting nutritionists for hospitals and health training |
| PROV1 | 1. Strengthen the school food program by ensuring: i) food supply from local producers; ii) development of menus and nutritional standards based on local products, iii) technical and financial institutional support |
| PROV5 | 1. Develop strategies that promote exclusive breastfeeding by women within local communities **(*****)** |
| PROV3 | 1. Update and popularize food guides |
| PROV2 | 1. Evaluate the quality of food service provision in public structures (school canteens, military and prison services, university services, hospitals, etc.) to promote the choice of healthy foods |
| RETAIL2 | 1. Strengthen the access of producers (market gardeners, fruit producers, etc.) to inputs and financial resources in order to improve the production of healthy foods |
| COMP1 | 1. Develop a standards document for nutrients of concern in foods |
| LABEL3 | 1. Strengthen the technical structures responsible for controlling the labeling of packaged foods (control tools, capacity building and institutional support) |
| PROMO1 | 1. Carry out by the Food and Nutrition Council (CAN) the assessment of the level of exposure of children to the advertising of unhealthy foods through television and radio |
| **Burkina Faso** | |
| PROMO 3.1 | - - - 1. Develop regulatory texts prohibiting the advertising of unhealthy foods in children’s living environments (school, sports field, playground |
| COMP3.2 | 1. Make compliance with food standards, including infant flour, mandatory (*) |
| PROV6.4 | 1. Strengthen the construction of access to drinking water and sanitation (*) |
| PROV5.3 | 1. Create spaces in workplaces to facilitate infant care. (*) |
| COMP3.1 | 1. Adopt a monitoring plan for food enrichment programs including infant flour (*) |
| PROV1.1 | 1. Strengthen the national school feeding program by integrating menus based on local products, nutritional standards and monitoring tools |
| PROV1.2 | 1. Accelerate the scaling up of nutrition education in curricula in schools |
| PROV5.2 | 1. Increase the duration of breastfeeding hours from 1.5 hours per day to 3 hours per day (*) |
| PROMO 1.1 | 1. Develop a regulatory text that prohibits the promotion of unhealthy foods: audiovisual media |
| PROMO 2.1 | 1. Develop a regulatory text that prohibits the promotion of unhealthy foods: non-broadcast media |
| **Cote d’Ivoire** | |
| PROV1.1 | 1. Strengthen the implementation of the school feeding policy: food supply from agricultural cooperatives; financial and technical institutional support; popularization of the local products menu manual |
| PROMO4.1 | 1. Make the National Committee for the promotion, protection and support of breastfeeding and early childhood development functional (*) |
| PROMO3.8 | 1. Adopt a law for food in schools and preschools |
| PROV5.9 | 1. Strengthen the institutional and legal framework regarding breastfeeding (e.g.: revision of the labor code, mother/father leave, breastfeeding time, etc.) (*) |
| PROV3.6 | 1. Strengthen awareness of good nutritional practices in schools |
| COMP2.6 | 1. Train and raise awareness among catering stakeholders in good culinary and nutritional practices |
| LABEL4.13 | 1. Develop and disseminate balanced and nutritious recipe guides |
| PROMO3.9 | 1. Take laws prohibiting the distribution of unhealthy food near schools |
| PROV5.10 | 1. Create a breastfeeding space (e.g. baby service, space designed for breastfeeding) to encourage effective breastfeeding for the mother in her workplace. (*) |
| PRIX3.6 | 1. Put in place incentive measures to facilitate the transport of healthy foodstuffs from the most served regions to the least served regions |
| **Sénégal** | |
| COMP2 | 1. The government defines a model of good practices and nutritional standards by focusing on the content of nutrients of concern in foods offered (e.g. fried foods, etc.) in fast food establishments. |
| PROV 1 | 1. The government is developing regional school menus based on local products (expand to the 14 regions) |
| PROV 1 | 1. The government is implementing nutritional standards for school meals |
| LABEL 1 | 1. The government introduces mandatory legislation for nutrients (energy, saturated fat, total fat, protein, carbohydrates, sugars and salt) on packaging |
| PROMO1 | 1. The government uses media (public and private) to convey messages about healthy eating during peak viewing hours. |
| LABEL 1 | 1. The government is strengthening controls on compliance with the labeling and composition of foods |
| LABEL1-2 | 1. The government should transpose codex nutrient standards and claims into national legislation |
| COMP1 | 1. The government updates the food composition table |
| COMP1 | 1. The government increases the range of standards applied to processed products, particularly those most consumed by the population, and makes their application compulsory. |
| PROV 2 | 1. The government is putting in place nutritional standards for university/hospital/prison meals, etc. |
| **Togo** | |
| PROV4 | 1. Integrate into the ANJE strategy the notion of arranging time, space and resources favorable to breastfeeding in the workplace |
| COMP1 | 1. Develop a complete and up-to-date food composition table |
| PROMO4 | 1. Mobilize resources for the implementation of the breastfeeding action plan (*) |
| PROV5 | 1. Advocate for the adoption of a law allowing maternity leave to be increased from three and a half to six months (*) |
| PROMO4 | 1. Accelerate the process of developing and adopting the draft text relating to breast milk substitutes (*) |
| PROV1 | 1. Strengthen control of food served in schools without school canteens |
| 1. Strengthen the current school food policy for national coverage with supplies from agricultural cooperatives, institutional, technical and financial support, menus and nutritional standards, popularization of these menus at the national level and nutritional education |
| 1. Finalize and adopt the national healthy and balanced diet policy in school, extra-curricular and university environments |
| COMP1 | 1. Finalize and adopt the decree on the composition of foods relating to nutrients of concern (trans fatty acids, sugar and salt) |
| PROMO1 | 1. Establish a decree clearly defining authorized (healthy) and unauthorized (unhealthy) foods for advertising to children. |

(*): Recommended actions related to the new indicators

- Ten key actions to support infrastructure of each country

| **Indicators/ Domains** | **Actions prioritaires du soutien à l’infrastructure recommandées au gouvernement** |
| --- | --- |
| **Benin** | |
| **GOVER 2** | 1. Popularize research results |
| **MONIT 1** | 1. Establish by the CAN a system for monitoring food environments: the composition of foods and the nutrients of concern, the promotion of children's diets and the nutritional quality of foods in schools and other public sector establishments. |
| **LEAD 5** | 1. Intensify communication actions on NCDs |
| **LEAD 4** | 1. Finalize the nutrition policy document |
| **LEAD 2** | 1. Carry out a national food consumption survey by the CAN with a view to establishing specific objectives relating to nutrients of concern |
| **LEAD 3** | 1. Develop specific food guides for diabetics and other specific pathological cases by the CAN and the Ministry of Health |
| **LEAD 1** | 1. Advocacy for strengthening the budget line allocated to the fight against diet-related non-communicable diseases (NCDs) |
| **LEAD 5** | 1. Integrate the concepts of NCD diagnosis into training curricula |
| **GOVER 2** | 1. Strengthen the CAN structure responsible for collecting evidence from studies carried out by universities and research structures. |
| **MONIT 8** | 1. Integrate nutritional monitoring into the school feeding program (scaling up the national integrated school feeding program) (*) |
| **Burkina Faso** | |
| LEAD 6.2 | 1. Accelerate the transition to ANJE scale (*) |
| LEAD 2.2 | 1. Develop a national food composition table |
| LEAD 6.1 | 1. Implement a policy specific to exclusive breastfeeding (*) |
| LEAD 1.2 | 1. Constitutionalize the right to healthy, diversified and balanced food |
| LEAD 9 | 1. Strengthen the actions implemented in the fight against malnutrition (*) |
| LEAD 1.3 | 1. Strengthen advocacy for a budget line for nutrition |
| LEAD 3 | 1. Develop national dietary recommendations and guide based on food consumption surveys |
| MONIT 2.1 | 1. Continually evaluate the quality of food served in canteens and restaurants |
| MONIT 9.2 | 1. Develop a regulatory text on Food Safety (*) |
| GOVER 3.1 | 1. Strengthen the inclusive process in the development of food and nutrition policies |
| **Côte d’Ivoire** | |
| LEAD1.1 | 1. Strengthen existing mechanisms and the functioning of bodies at the regional level of CONNAPE |
| MONIT9.9 | 1. Develop and implement a food safety monitoring plan (*) |
| LEAD4.7 | 1. Accelerate the writing of the new multisectoral national nutrition plan completing the 2016-2020 plan |
| FUND2.4 | 1. Strengthen current research funding initiatives (CONNAPE/PNMIN, REPSAO, PASRES, FONSTI, etc.) |
| MONIT9.11 | 1. Develop a food safety policy (*) |
| HIAP1.1 | 1. Strengthen CONNAPE’s participation in the development of sector programs and strategies |
| GOVER2.2 | 1. Strengthen cooperation between research structures (Universities, major schools, research centers) and political coordination (CONNAPE) to help guide political strategies |
| HIAP1.3 | 1. Develop the compendium of nutrition indicators |
| LEAD9.14 | 1. Maintain advocacy for political support for actions aimed at combating all forms of malnutrition (focus on the private sector) (*) |
| LEAD5.9 | 1. Accelerate the operationalization of the implementation of the strategic breastfeeding plan (ISSAB, PNMA) |
| **Sénégal** | |
| PROMO 1 | 1. Carry out a study to measure the extent of the promotion of unhealthy foods to children |
| COMP 1.2 | 1. Carry out a national food consumption survey to measure intake of nutrients of concern (salt, sugar, fat) including consumption outside the home and the different food sources consumed. |
| LEAD 3 | 1. Finalize dietary recommendations and visual food guide |
| MONIT 2 | 1. Include children aged 6-9 years in the periodic nutritional profile monitoring system |
| PLATF 1 | 1. Strengthen the NCD monitoring system in the “national strategic plan to combat NCDs” by integrating multisectorality |
| 1. Promote the establishment of two SUN platforms for academics and the private sector |
| LEAD 4 | 1. Develop an implementation plan for dietary recommendations |
| MONIT 1 | 1. Evaluate the existing monitoring and evaluation system for school canteens and others to strengthen the system |
| MONIT 2 | 1. Establish a periodic monitoring system through surveys on food intake (example every 10 years) |
| PLATF 3 | 1. Strengthen the consultation framework between the State and civil society (NGOs, consumer associations, etc.) to better manage food policies and other interventions to improve the nutrition of populations. |
| **Togo** | |
| MONIT6** | 1. Strengthen awareness among pregnant women on good dietary practices during pregnancy |
| MONIT6** | 1. Create a budget line for the purchase of iron, folic acid and calcium to supplement pregnant women |
| MONIT6** | 1. Strengthen nutritional education for women and vulnerable populations at the community level |
| MONIT6** | 1. Establish a national plan healthy eating communication for pregnant women |
| LEAD3 | 1. Develop national dietary guidelines and a visual food guide |
| LEAD9 | 1. Strengthen collaboration (synergy of action) between the nutrition division and the NCD surveillance division to take into account the fight against the triple burden of malnutrition (*) |
| MONIT3 | 1. Provide a budget line for surveys (nutritional and national food consumption) to have data on the triple burden of malnutrition on the population in general and on specific groups in particular. |
| MONIT2 | 1. Determine a budget line for monitoring the nutritional status of the population (obesity, deficiencies, etc.) |
| LEAD2 | 1. Conduct a national food consumption survey targeting particularly intakes of salt, sugar and saturated fat to specify the objectives for reducing consumption. |
| LEAD6 | 1. Accelerate the review of the ANJE strategy with particular emphasis on the “Baby-Friendly Hospitals” initiative (*) |

(*) : Recommended actions related to the new indicators

(**): Recommended actions for pregnant women based on three indicators integrated into “MONIT6”.
