# Supplementary material
Source: Research Square preprint supplement (doi:10.21203/rs.3.rs-8988792/v1)
Supplement: Supplementary file 2 [file 9f89fcb9462a145be2ca138d.docx]

**Supplementary material 2:** Examples of best practices from the results

Examples of best practices to be promoted were identified, documented from these results and resulted from indicators with a “medium” or “high” level of implementation (Table below). The table below presents some examples of good practices of 13 indicators in healthy food environment policies and the full good practice document was reported in the overall project report.

**Supplementary material 2:** Some examples of best practices of policy and infrastructure support indicators with a “medium” or “high” level of implementation.

| **Indicators** | **Examples of best indicators pratices** |
| --- | --- |
| **COMP3** | - To combat micronutrient deficiencies, **all five countries** developed during the 2006-2013 period policies and/or strategies for fortifying edible oils with vitamin A and common wheat with iron-folic acid and zinc. In addition, countries have regulatory provisions requiring all salt intended for human consumption within the national territory to be iodized. Finally, some countries have put in place coordinating bodies such as the alliance for food fortification in Ivory Coast and the Senegalese Committee for the Fortification of Foods with Micronutrients. |
| **PROMO4** | - To protect and encourage breastfeeding, the **Ivorian and Burkinabe** governments have respectively opted for decree No. 2013-416 of June 6, 2013 **(1)** and decree No. 2021 of March 17, 2021**(2)**, regulating the marketing (promotion, packaging and labeling) of breast milk substitutes (SLM) including formulas for infants and young children, other milk products, foods and drinks and complementary foods. These decrees include explicit provisions prohibiting free distribution to manufacturers and distributors, promotional sales and advertising of SLMs. Administrative sanctions and penal provisions are also provided for by these decrees **(1,2)**. |
| **PROV1** | - **In Togo**, school food is regulated by law N02020-007 of June 26, 2020. This aims “to guarantee basic education to each student, especially students located in the most vulnerable, access to sufficient and balanced school food and to promote the development of local production **(3)** - **In Côte d'Ivoire**, in addition to having a school canteen menu manual which is an information and training document for school canteen stakeholders in matters of nutrition and food hygiene for public primary and secondary schools, the country has developed a national school feeding policy (PNAS) 2018-2025 and a national school feeding strategy 2018-2022 to operationalize it. The PNAS's vision is: "By 2025, all students in Côte d'Ivoire enrolled in basic education structures will have a hot and balanced meal in the canteen every school day." **(4)**. - **In Burkina Faso**, the consideration of school feeding as an important instrument of social protection and the fight against malnutrition for better school performance was the subject of Presidential Decree No. 2020-03/MICA/MS/PM /SG/DGDR to establish a Technical Consultation Framework for the Presidential initiative with the aim of: “ensuring each child of school age at least one balanced meal per day” by providing an envelope with partners of 502 billion FCFA and a National School Food and Nutrition Strategy (SNANS) for the period 2021-2025 which becomes the reference framework for all interventions in this area in Burkina Faso**(5)**. - **In Benin**, the adoption of the National School Feeding Policy in 2014 **(6)** and the creation of the Integrated School Feeding Program in 2018 **(7)** were policy measures to reduce child malnutrition. The objective is to reduce hunger among schoolchildren “by developing a multi-sectoral approach and favoring local purchases to improve academic performance, dietary diversity and the nutrition of students in schools with canteens”. Thus, the national coverage rate increased from 29% to 51% between 2018-2020 **(6,7)**. |
| **PROV2** | - **In Burkina Faso,** a political commitment was made in 2017 by the Head of Government, by establishing two decrees to encourage the purchase and consumption of local products by the food services of public structures (no. 2017-002/PM/ CAB of January 13, 2017 **(8)**, and No. 2017-002/PM/CAB of January 31, 2017**(9)**. The Government has also taken strong measures to support the marketing and consumption of local food products by establishing the list of local food products and the public structures concerned (school and university canteens, vocational training centers, hospitals, military barracks, remand and correctional centers, ministerial departments, etc.) **(8-10)**. The obligations are, among others: i) “obligation on all public structures consuming food products to remove as a priority those of local origin before any act of purchasing a similar imported product; and ii) obligation for public structures to integrate local dishes into menus; coffee breaks, lunch breaks, gala dinners, dinner debates during workshops, etc. To support these political decisions, the National Food and Nutrition Security Policy 2018-2027 and the National School Food and Nutrition Strategy 2021-2025 become privileged political tools to promote and guarantee the government's political will in this area. of the slogan “let’s consume Burkinabé” **(5)**. |
| **PROV6** | - **In Burkina Faso**, the Multisectoral Strategic Nutrition Plan 2020-2024 provides for several nutrition-sensitive interventions for the WASH sectors such as: “i) the promotion of hand washing at critical times; ii) access to sanitation infrastructure and drinking water; and iii) promotion of good water transport, storage, conservation and treatment practices; and iv) the promotion of new strategies for access to sanitation (Community-Led Total Sanitation (CLTS), Leader-Driven Total Sanitation (ATPL), etc.). This latest CLTS strategy adopted by the Council of Ministers in 2014 aims to improve the living conditions of communities by putting an end to open defecation**(11)**. - **In Senegal**, the vision of the sanitation policy (2016-2025) explicitly aims to contribute to achieving the SDGs of ensuring universal access to drinking water and sanitation by 2030 while ensuring integrated management of water resources. The policy emphasizes (i) household access to sustainable sanitation, (ii) wastewater and rainwater management and (iii) elimination of open defecation. In 2017, Senegal conducted a national household survey focused on WASH to establish a reliable baseline on water and sanitation in the context of the SDGs. The Sanitation and Rainwater Management Program (PAGEP) focuses on the development of sustainable sanitation systems in urban, peri-urban and rural areas, including gender-sensitive sanitation facilities in schools and centers health, and the reduction of open defecation to ultimately achieve its elimination **(12)**. |
| **LEAD1** | - **In all countries,** political and visible support for nutrition is marked by the implementation of a set of policies, strategies and programs aimed at improving the nutrition of populations. The multi-sectoral nutrition platforms created in the five countries demonstrate political leadership in addressing nutrition using a holistic approach **(13-21)**. |
| **LEAD6-9** | - **In all countries**, the health of mother and child is a political priority in terms of nutrition. Indeed, all countries have developed and implemented either breastfeeding policies or strategies “LEAD6”, complementary feeding “LEAD7” and defined objectives in terms of exclusive breastfeeding and complementary feeding “LEAD8 ". - In addition, strong and visible political support for actions aimed at combating all forms of malnutrition throughout the life cycle, especially undernutrition (wasting, stunting, underweight, micronutrient deficiency) at the national “LEAD9” is recognized in all countries **(13-21)**. |
| **GOVER 2** | - **In Ivory Coast**, to align political actions around common results in nutrition, the National Multisectoral Information Platform (PNMIN) for Nutrition was established in 2017 to: i) facilitate multi-sectoral and multi-faceted dialogue -actor on nutrition; (ii) support the use of existing information and data; iii) develop and adjust policies and programs to prevent malnutrition. This initiative aims to strengthen national capacities to collect and analyze information and data from all sectors concerned with nutrition with a view to guiding decision-making and investments in nutrition. - To facilitate the operationalization of the PNMIN, the government created by order N0 506/PM/CB of September 21, 2018, the management unit of the PNMIN **(22)**. Finally, the existence of the National Council for Nutrition, Food and Early Childhood Development (CONNAPE) created by Decree No. 2019-569 of June 26, 2019, is a body that facilitates the use of evidence in the development of food policies **(18)**. - Indeed, CONNAPE's mission is to coordinate the identification and implementation of actions with a view to contributing to improving the nutritional status of the population by achieving, among other things, the following objectives: i) defining the orientations and national priorities for nutrition, food and early childhood development; ii) coordinate all interventions and ensure consistency between the actions carried out and the national political guidelines in this area; iii) ensure the integration of nutrition, food and early childhood development programs and indicators into the recovery and economic growth strategy, and sectoral plans; and iv) assess progress made in the implementation of the national nutrition, food and early childhood development policy **(18)**. |
| **MONIT7-8** | - **In the five countries**, breastfeeding and complementary feeding indicators are often reported at the national level by national surveys such as demographic and health surveys, national SMART surveys, etc. as part of monitoring the nutritional status of vulnerable populations, particularly women aged 15-49 and children under 5 years “MONIT7”. In addition, in all five countries, monitoring the promotion of child growth and development “MONIT8” is a routine activity at the level of socio-health structures. Some countries such as Côte d'Ivoire and Benin have strengthened this routine activity by developing national guidelines for monitoring and promoting the growth of newborns, infants and young children which make it possible to assess weight gain. and size, to detect malnutrition early for optimal growth. |
| **PLATF1** | - **All countries** have multi-sectoral nutrition platforms that are placed at the highest level of government and provide political leadership on food and nutrition **(13-21)**. These platforms constitute a multisectoral and multidisciplinary advisory framework bringing together representatives of all Ministries directly or indirectly concerned with the issue of nutrition, as well as representatives of civil society, the private sector, research and the world. academic. These bodies coordinate the development and implementation of food and nutritional policies. This approach also aims to promote the integration of evidence into the development of food and nutritional policies. - We can cite: i)**In Benin:** The Food and Nutrition Council of Benin created by decree 2009-245 of June 9, 2009 **(13)**; ii) **In Burkina Faso**: The creation by decree No. 2008-003/PRES/PM/MS/MAHRH/MASSN/ MEF of January 10, 2007 of the National Nutrition Consultation Council in Burkina Faso **(14)** then of the Technical Secretariat Responsible for improving nutrition Food and Nutrition by decree No. 2018-0093/PRES/PM/MS of February 15, 2018 and finally **(15)**, Finally, the National Nutrition Council (CNaN) by Decree No. 2021 --0929/PRES/PM/MINEFID/MS/MESRSI/MAAHM/MRAH**(16)**; iii) **In Ivory Coast** : The decree of July 16, 2014 creating the National Council for Nutrition in Côte d'Ivoire **(17)** which became by decree in 2019 the National Council for Nutrition, Food and Early Childhood Development **(18)** ; iv) **In Senegal**: The Cell for the Fight against Malnutrition created in 2001**(19)** and which became the National Nutrition Development Council by decree 2020-1820 **(20)**; v)**In Togo:** The multisectoral Taskforce for strengthening nutrition in Togo by interministerial decree No. 0023/2017/MPD/MSPS /MAEH/MASPFA **(21).** |

**Références**

1. Présidence de la République de Côte d’Ivoire : Décret N°2013-416 du 6 juin 2013 portant réglementation des substituts du lait maternel ; repérable au: <https://www.ibfan.org/wp-content/uploads/2023/05/Cote-dIvoire-2013-French-Code-Regulations-DECRET-REGLEMENTATION-COMM-SUBSTIT-LAIT-MATERNEL.pdf>
2. Présidence de la République du Burkina Faso : DECRET N°2021 du 17 mars 2021 /PRES/PM/MICA/MS/MRAH/MAAHM portant règlementation de la commercialisation des substituts du lait maternel (SLM), des aliments pour nourrissons et jeunes enfants et des ustensiles d’alimentation. Repérable au : <https://www.babymilkaction.org/wp-content/uploads/2022/09/Draft_-CT_decret-SLM-decret_10022021_VF.pdf>
3. Présidence de la République du Togo : Décret N°2020-007 du 26 juin 2020 relative à l’alimentation scolaire, 2020. Repérable au : <https://jo.gouv.tg/sites/default/files/JO/JOS_26_06_2020%20-%2065%20E%20ANNEE%20N%C2%B021.pdf>
4. Ministère de l’Éducation Nationale, de l’Enseignement Technique et de la Formation Professionnelle de Côte d’ivoire, Direction des cantines scolaires : Politique Nationale d’Alimentation Scolaire (PNAS) 2018-2025.
5. Présidence de la République du Burkina Faso : Stratégie Nationale d’Alimentation et de Nutrition Scolaires (SNANS) au Burkina Faso 2021-2025
6. Ministère des enseignements maternel et primaire du Bénin et Direction de l’Alimentation scolaire : Document de politique nationale de l’alimentation scolaire, 2014
7. Ministère des enseignements maternel et primaire du Bénin et Direction de l’Alimentation scolaire : Programme National d’Alimentation Scolaire Intégré, 2017
8. Premier Ministre- Burkina Faso : Arrêté N° 2017-002 PM/CAB du 13 janvier 2017 portant achat des produits alimentaires locaux par les structures Étatiques dans le cadre de leur approvisionnement.
9. Premier Ministre- Burkina Faso : Arrêté N°-----PM/CAB portant modification de l’arrêté N° 2017-002 PM/CAB du 31 janvier 2017 portant achat des produits alimentaires locaux par les structures Étatiques dans le cadre de leur approvisionnement. Repérable au : <https://faolex.fao.org/docs/pdf/bkf198240.pdf>
10. Autorité de régulation de la commande publique (ARCOP)- Burkina Faso : Circulaire du N° 2021-027 /ARCOP /CR du 06 octobre 2021 portant promotion de la consommation des produits locaux en application des deux arrêtés.
11. Ministère de la Santé – Burkina Faso : Plan Stratégique Multisectoriel de la nutrition 2020-2024
12. Ministère de l’Hydraulique et de l’assainissement du Sénégal : Lettre de Politique Sectorielle de Développement 2016-2025
13. Présidence de la République du Bénin. Décret N° 2009-245 du 09 Juin 2009 portant création, attributions, organisation et fonctionnement du Conseil National de l’Alimentation et de la Nutrition. 2009.Repérable au : <https://sgg.gouv.bj/pdf/web/viewer.html?file=/doc/decret-2009-245/read>
14. Présidence de la République du Burkina Faso : DECRET N° 2008-003/PRES/PM/MS/MAHRH/MASSN/ MEF du 10 janvier 2007 portent création, attributions, composition, organisation et fonctionnement du conseil national de concertation en nutrition (CNCN).Repérable au : <https://www.fao.org/faolex/results/details/fr/c/LEX-FAOC078701/>
15. Présidence de la République du Burkina Faso : Décret N° 2021 -0929/PRES/PM/MINEFID/MS/MESRSI/MAAHM/MRAH portant création, attribution, organisation et fonctionnement du Conseil National pour la Nutrition (CNaN)
16. Ministère de la santé et de l’Hygiène Publique – BKF : Arrêté N°2023 /MSHP/CAB portant attribution, organisation et fonctionnement du Secrétariat Technique chargé de la Multisectorialité de la nutrition (ST/Nut)
17. Présidence de la République de Côte d’Ivoire : Décret N°2014-433 du 16 juillet 2014 portant création, attribution, organisation et fonctionnement du Conseil National de la Nutrition (CNN), 2014. Repérable au : <https://www.pnmin.gouv.ci/fichier/doc/DECRET_SUN.pdf>
18. Présidence de la République de Côte d’Ivoire : Décret N°2019-569 du 26 juin 2019 portant création, attribution, organisation et fonctionnement du Conseil National pour la Nutrition, l’Alimentation et le Développement de la Petite Enfance (CONNAPE), 2019
19. Présidence de la République du Sénégal : Décret N°2001- 770 du 05 octobre 2001 relative à la Cellule de lutte contre la malnutrition (CLM), 2001
20. Présidence de la République du Sénégal : Décret N°2020-1802 portant création et fixant les règles d’organisation et de fonctionnement du Conseil National de Développement de la Nutrition, 2020
21. République Togolaise : Arrêté interministériel N°0023/2017/MPD/MSPS /MAEH/MASPFA portant création, attribution, composition et fonctionnement d’une **Task Force** multisectorielle pour le renforcement de la nutrition au Togo.
22. **Premier Ministre- de la République de Côte d’Ivoire : Arrêté** N°506/PM/CAB du 21 SEPTEMBRE 2018 portant création, attribution, organisation et fonctionnement de l’Unité de gestion du projet de mise en place d’une Plateforme Nationale Multisectorielle d’Information pour la Nutrition, 2018.
