# Supplementary material
Source: Research Square preprint supplement (doi:10.21203/rs.3.rs-8988792/v1)
Supplement: Supplementary file 3 [file c6e06e1bbcafb9521a2aeccb.docx]

**Supplementary material 1** : Criteria for prioritizing actions to be recommended to the Government

| **Criteria** | **Description** |
| --- | --- |
| Importance (C1) | **Need**: The size of the implementation gap. **Impact**: The effectiveness of the action on improving food environments and diets (including reach and effect size). **Equity:** Progressive/regressive effects on reducing food/diet-related health inequalities. **Other positive** **effects**:(e.g. on protecting rights of children and consumers) (e.g. regressive effects on household income, infringement of personal liberties. |
| Achievability (C2) | **Feasibility**: How easy or hard the actions is to implement. **Acceptability**: The level of support from key stakeholder including government, the public, public health and industry. **Affordability**: The cost-effectiveness of the action. **Efficiency**: The cost-effectiveness of the action. |
| Potential effect of the action on the double burden of malnutrition (C3) | **Beneficial effect**: Does the implementation of the action have a beneficial effect on the double burden of malnutrition. **Aggravating or neutral effect:** Does the action increase the risk of other forms of malnutrition or NCD or not |
| Potential effect of the action on the gender (C4) | **Beneficial effect**: The implementation of the action has a beneficial effect on gender inequalities. **Aggravating effect**: The implementation of the action increases the risk of other forms of inequalities according to gender. **Neutral effect**: The implementation of the action has no effect on gender inequalities |
| Potential effect of the action on the sustainability (C5) | **Beneficial effect**: The implementation of the action has a beneficial effect on the sustainability. **Aggravating effect**: Implementation of the action increases the risk of adverse effects on the sustainability. **Neutral effect**: The implementation of the action has no effect on the sustainability. |

NCD, noncommunicable diseases. Each proposed action was ranked from: (i) higher importance to lower; (ii) high probability achievability to lower and (iii) greater potential beneficial effect at a lower or neutral on the double burden of malnutrition;iv) greater potential beneficial effect at a lower or neutral on the gender inequalities; v) greater potential beneficial effect at a lower or neutral on the sustainability using the 5 to 1 scale (i.e. attribution number from 5 to 1)
